# Supplementary material for: A terpene nucleoside from M. tuberculosis induces lysosomal lipid storage in foamy macrophages
Source: PubMed Central journal article supplement (PMC10014106; doi:10.1172/jci161944), 2023-03-15
Supplement: jci-133-161944-s165.pdf [file jci-133-161944-s165.pdf]

## List of Supplemental Figures and Table

- Supplemental Figure 1.** Synthetic 1-TbAd does not detectably activate immune response.
- Supplemental Figure 2.** 1-TbAd induces dose-dependent swelling of human macrophage lysosomes.
- Supplemental Figure 3.** 1-TbAd induces selective swelling of lysosomes in human macrophages.
- Supplemental Figure 4.** Fluorescence microscopy analysis of human alveolar macrophages (AM).
- Supplemental Figure 5.** Western blotting of autophagy markers in response to lysosomally active compounds.
- Supplemental Figure 6.** Summary of 1-TbAd induced lipid change in human macrophages.
- Supplemental Figure 7.** Quantitation of 1-TbAd induced neutral lipids.
- Supplemental Figure 8.** 1-TbAd induced lipid changes in membrane lipids.
- Supplemental Figure 9.** 1-TbAd influence on Ganglioside M3 (GM3) and lactosyl ceramide.
- Supplemental Figure 10.** HPLC analysis of an unknown macrophage-derived lipid.
- Supplemental Figure 11.** Analysis of lysosomal swelling in response to Mtb infection over time.
- Supplemental Table 1.** Listing of sources of antibodies, chemicals and cell lines.

## References for Supplemental Figures

Buter, J., Cheng, T.Y., Ghanem, M., Grootemaat, A.E., Raman, S., Feng, X., Plantijn, A.R., Ennis, T., Wang, J., Cotton, R.N., *et al.* (2019). Mycobacterium tuberculosis releases an antacid that remodels phagosomes. *Nat Chem Biol* 15, 889-899.

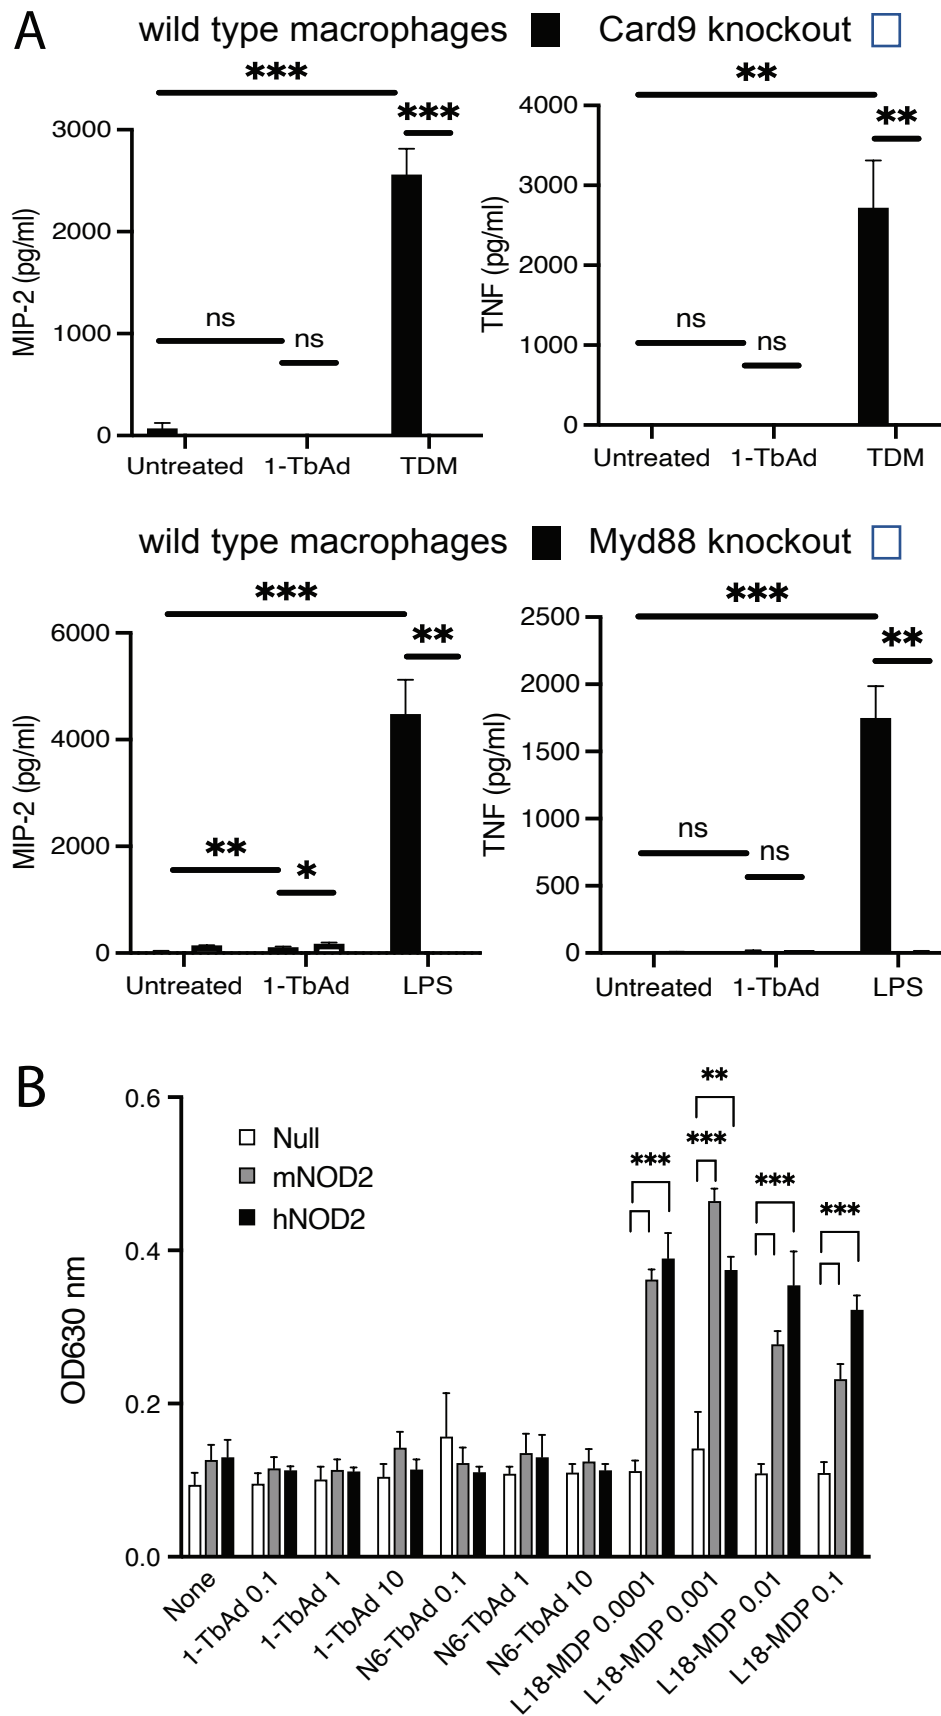

**Supplemental Figure 1. Synthetic 1-TbAd does not detectably activate immune response.** A. Wild-type, CARD9-and MyD88- macrophages were treated with 100 ng/well 1-TbAd, 10 ng/ml lipopolysaccharide (LPS), or 100 ng/well trehalose dimycolate (TDM) for 24 hours and subjected to ELISA. B. HEK-Blue cells (Invivogen) stably expressing mNOD2 or hNOD2 along with an NF- $\kappa$ B-inducible secreted alkaline phosphatase were stimulated with muramyl dipeptide (L18-MDP) or TbAd with the indicated micromolar dose. After stimulation, 5  $\mu$ l of cell culture supernatant was subject to a colorimetric enzymatic activity assay. Assays are representative of two or more experiments analyzed with the unpaired two-tailed Student's t-test (\*,  $p < 0.05$ ; \*\*,  $p < 0.01$ ; \*\*\*,  $p < 0.001$ ).

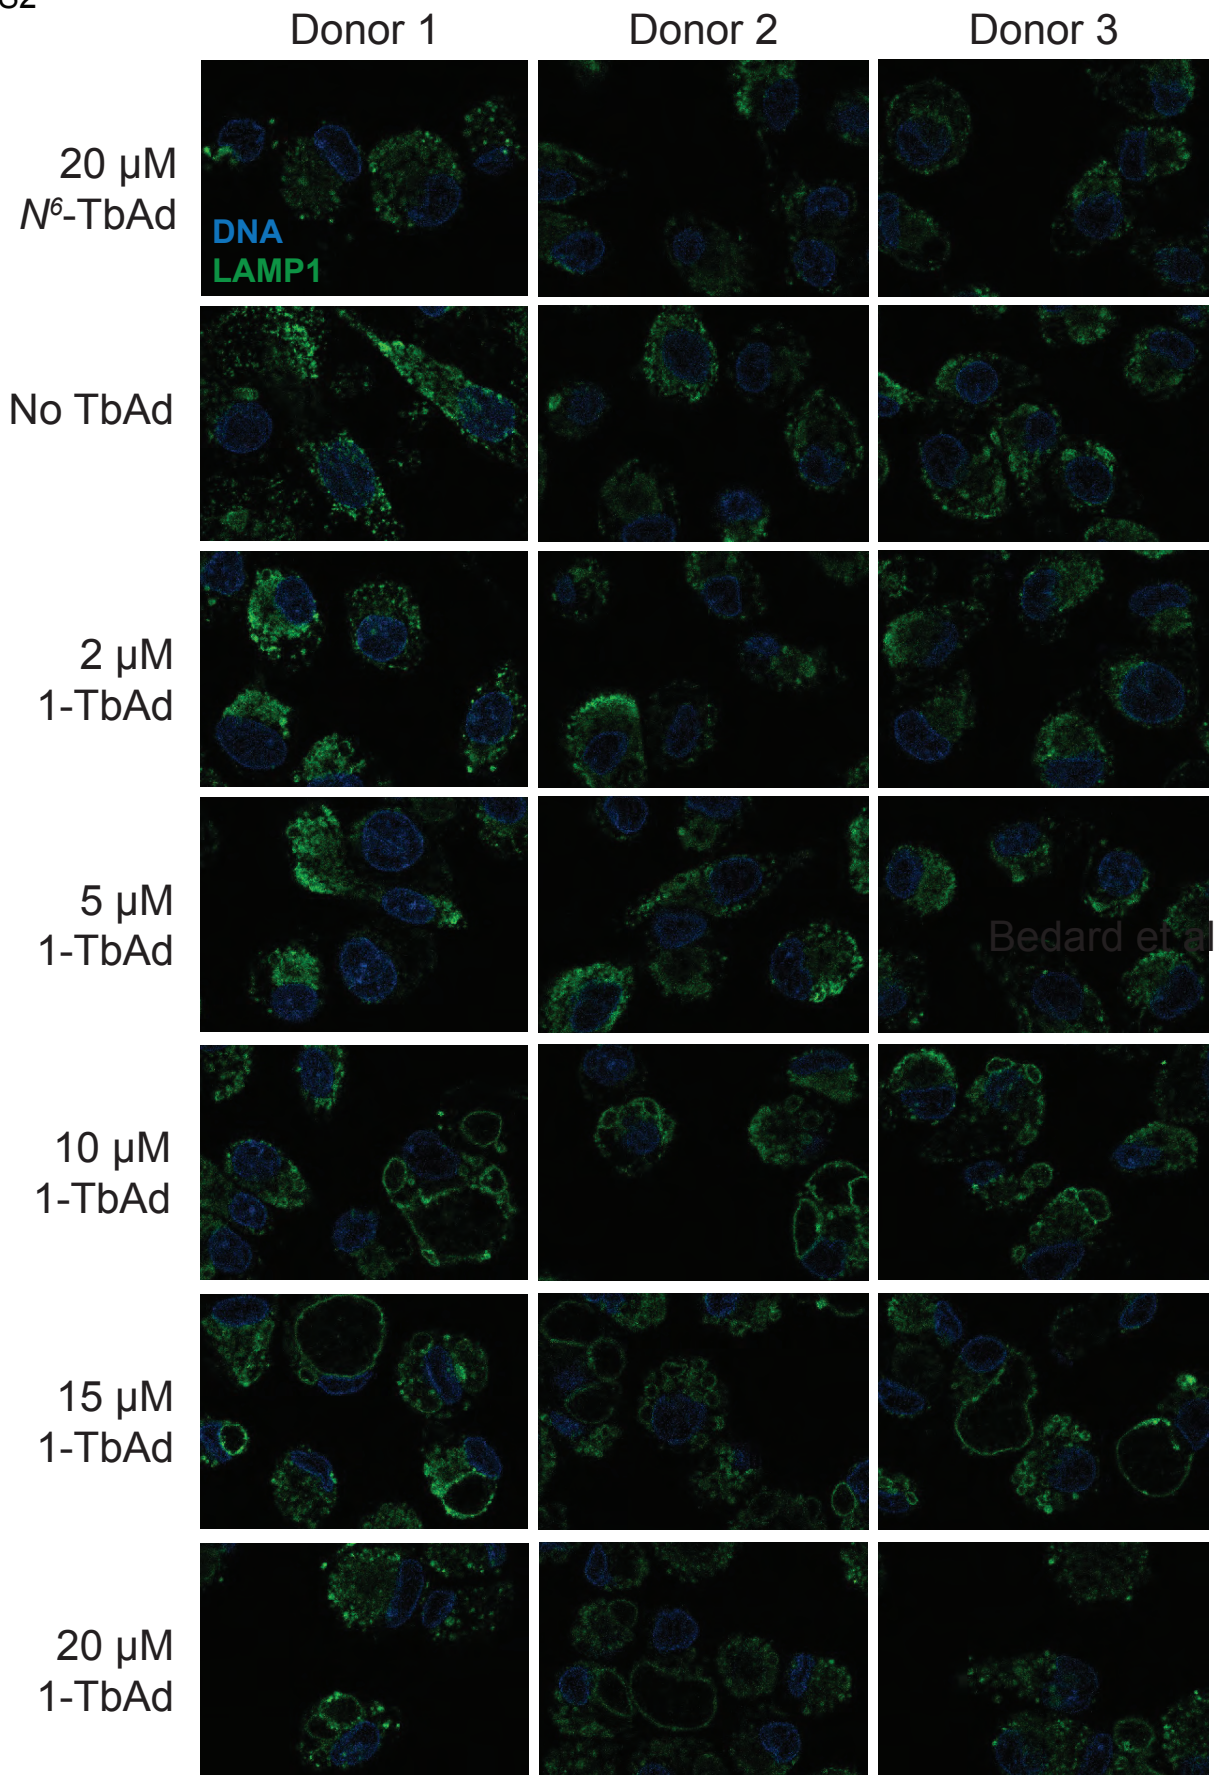

**Supplemental Figure 2. 1-TbAd induces dose-dependent swelling of human macrophage lysosomes.**

Representative images of LAMP1 staining following 4 hours of treatment with varying TbAd concentrations in human M1 macrophages from 3 human donors. LAMP1 compartments in untreated cells appear as puncta because they lack visible lumens, but 1-TbAd treated cells show large (0.5-5  $\mu$ m) LAMP1 rings indicative of lysosomal swelling.

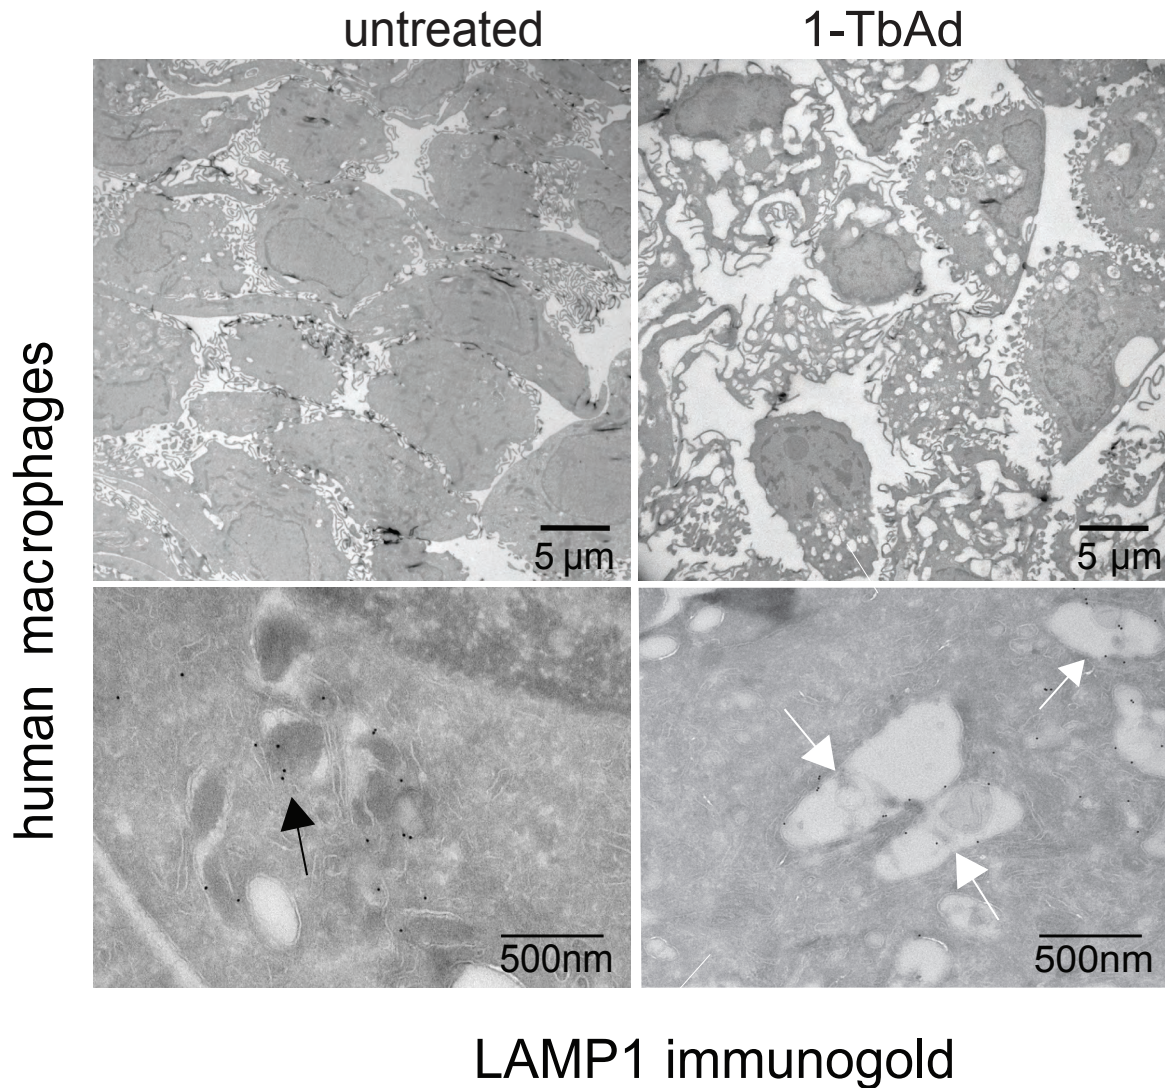

**Supplemental Figure 3. 1-TbAd induces selective swelling of lysosomes in human macrophages.** Low (upper panels) and high (lower panels) magnification of images of human M1 macrophages showed many small electron dense compartments, whereas cells treated with 10 μM 1-TbAd for 4 hours show loss of electron dense compact compartments and the appearance of large electron-lucent compartments. As contrasted to compact (~200 nm) electron dense lysosomes (black arrows), swollen (>500 nm) LAMP-1+ (black immunogold) lysosomes were electron lucent with intraluminal particulates (white arrows).

## A Human Alveolar Macrophages

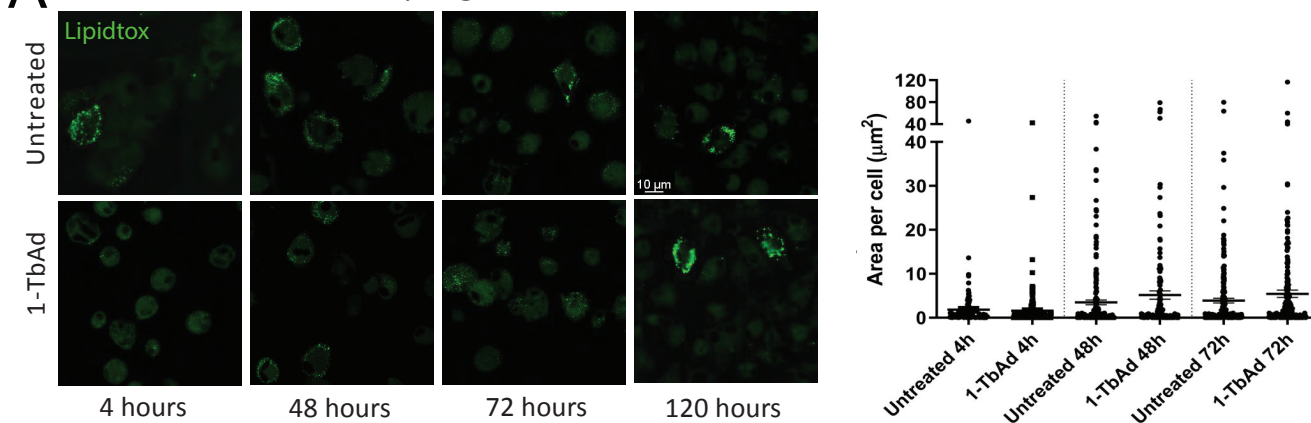B Time course at 20  $\mu$ M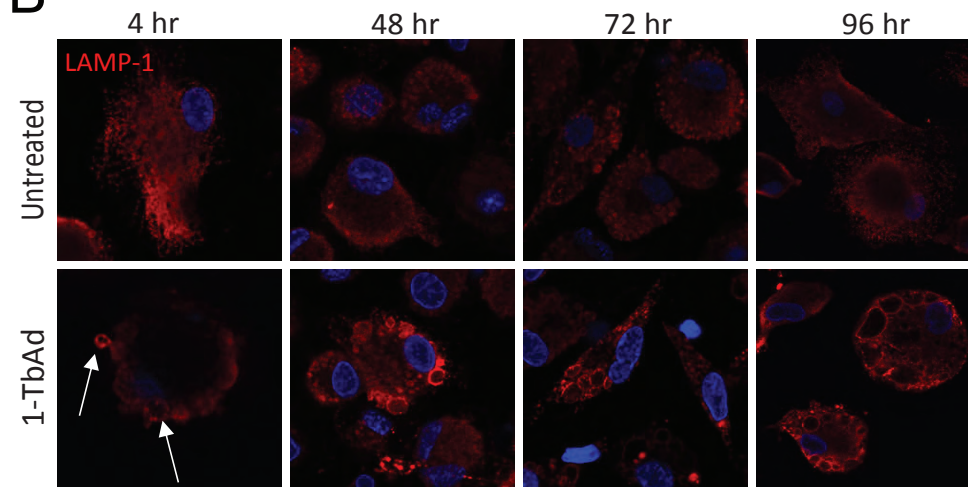

## C Dose-response at 48 hr

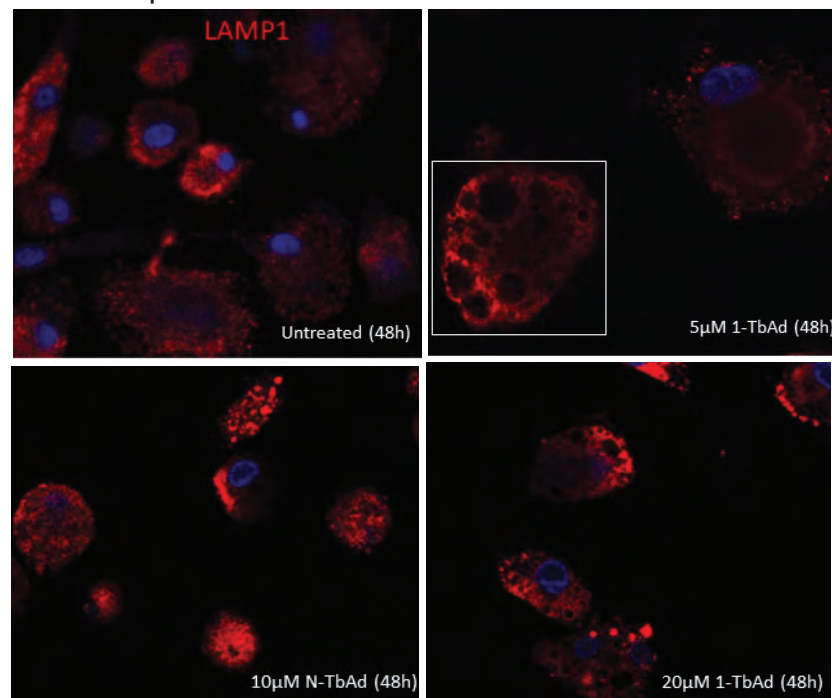**Supplemental Figure 4. Fluorescence microscopy analysis of human alveolar macrophages (AM).**

A. Representative images and quantification from LipidTox green staining of fresh AM from bronchoscopy of four human subjects; cells treated with 1-TbAd (20 $\mu$ M) or untreated for 2 hours, then chased, fixed, and treated with LipidTox for the indicated time. B-C. Human alveolar macrophages were treated with 1-TbAd at the indicated dose and time and subjected to anti-LAMP1 staining and immunofluorescence microscopy; whereas lysosomes from untreated cells appear as puncta, large (0.5-5  $\mu$ m) rings represent swollen lysosomal compartments. The 48 hour time point in the B panel is also shown in Figure 1F.

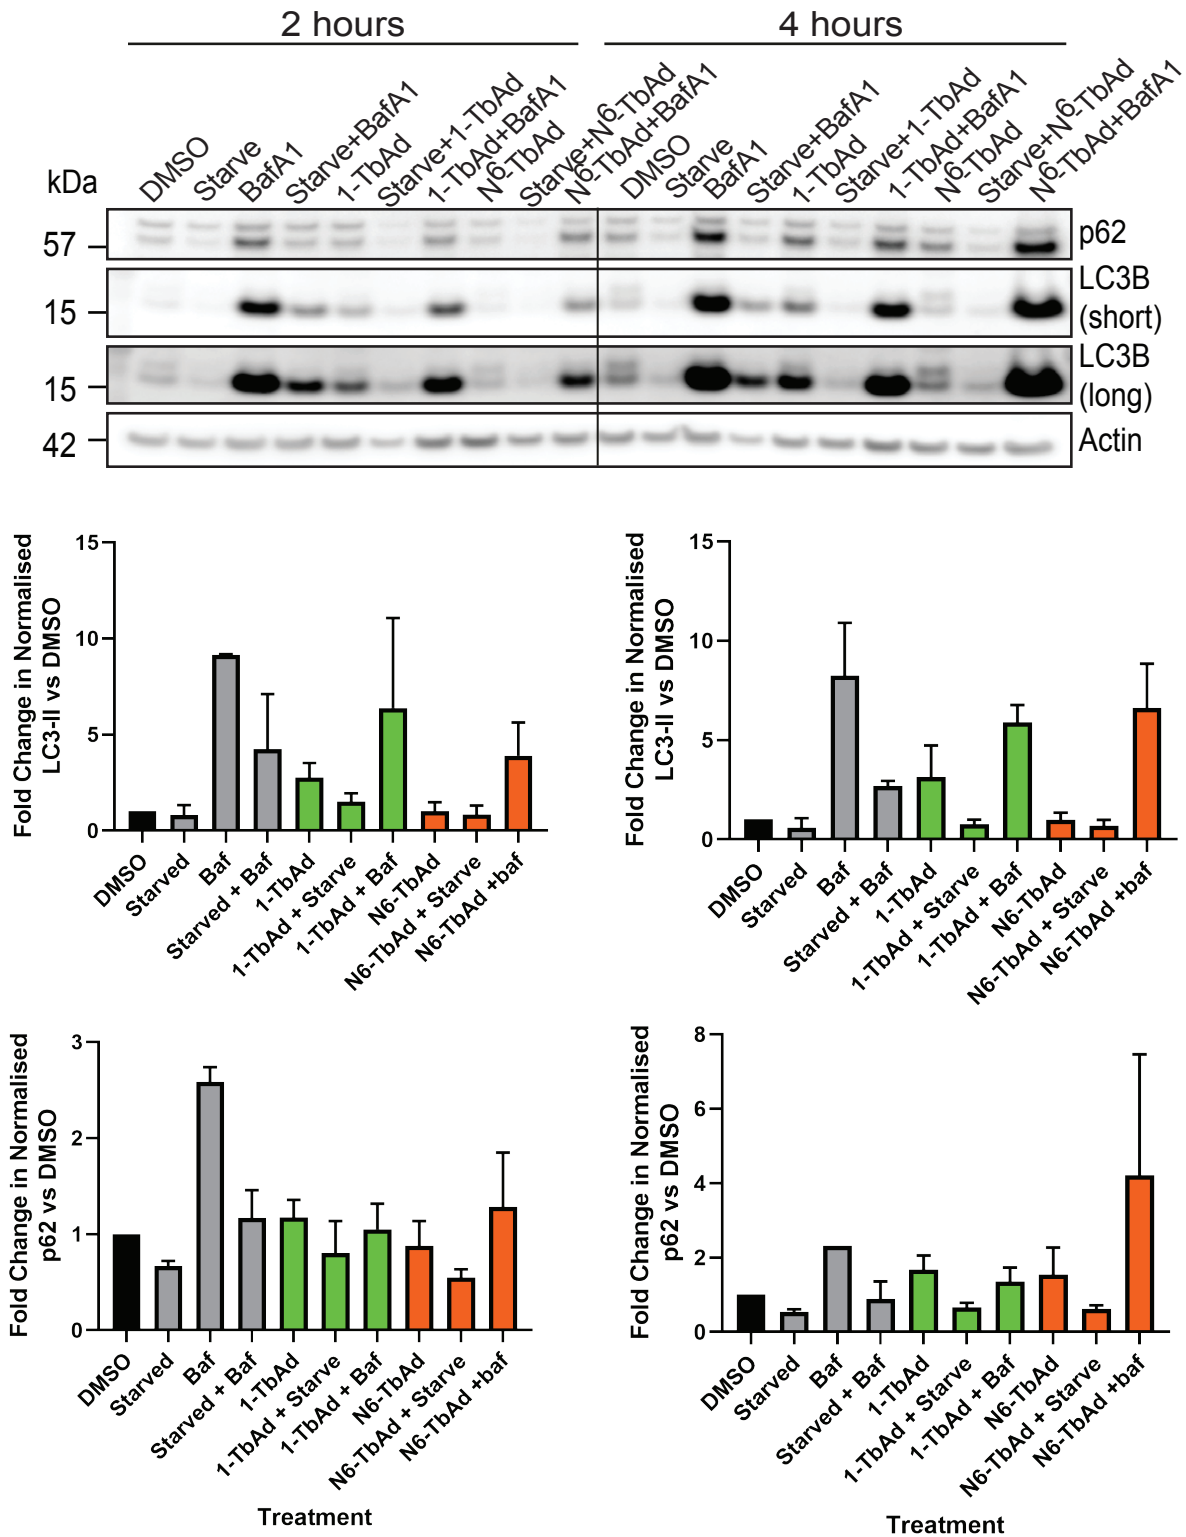

**Supplemental Figure 5. Western blotting of autophagy markers in response to lysosomally active compounds.**

Mouse macrophages were treated with nutrient-free Hank's buffered saline (starvation), chloroquine (CQ), dimethyl sulfoxide vehicle (DMSO), 1-TbAd, *N*<sup>6</sup>-TbAd, or Baf A1 for 2 or 4 hours, followed by blotting for p62, LC3-II, or actin loading control, in three separate experiments; quantification of bands relative to vehicle (DMSO) control shown for experiment 3.

Unidentified

total: 13 species

|   | detected<br><i>m/z</i> | RT<br>(min) |    | detected<br><i>m/z</i> | RT<br>(min) |
|---|------------------------|-------------|----|------------------------|-------------|
| 1 | 502.2934               | 3.066       | 8  | 580.3818               | 3.865       |
| 2 | 578.3097               | 3.227       | 9  | 496.3385               | 4.112       |
| 3 | 584.3607               | 3.272       | 10 | 426.3548               | 4.635       |
| 4 | 580.3648               | 3.301       | 11 | 860.5415               | 5.897       |
| 5 | 566.3497               | 3.301       | 12 | 318.3138               | 10.486      |
| 6 | 275.2567               | 3.707       | 13 | 840.5735               | 11.291      |
| 7 | 332.3290               | 3.831       |    |                        |             |

Known

6 lipid classes

total: 92 species

cholesteryl ester (CE)

|   | detected<br><i>m/z</i> | RT<br>(min) | formula                        | calculated<br><i>m/z</i> | lipid chain |
|---|------------------------|-------------|--------------------------------|--------------------------|-------------|
| 1 | 690.6170               | 14.796      | C47H80NO2 [M+NH4] <sup>+</sup> | 690.6184                 | 20:4        |
| 2 | 666.6176               | 14.886      | C45H80NO2 [M+NH4] <sup>+</sup> | 666.6184                 | 18:2        |
| 3 | 692.6318               | 14.907      | C47H82NO2 [M+NH4] <sup>+</sup> | 692.6340                 | 20:3        |
| 4 | 668.6330               | 15.070      | C45H82NO2 [M+NH4] <sup>+</sup> | 668.6340                 | 18:1        |
| 5 | 642.6189               | 15.099      | C43H80NO2 [M+NH4] <sup>+</sup> | 642.6184                 | 16:0        |

hexosylceramide (HexCer)

|   | detected<br><i>m/z</i> | RT<br>(min) | formula                      | calculated<br><i>m/z</i> | lipid chain |
|---|------------------------|-------------|------------------------------|--------------------------|-------------|
| 1 | 700.5694               | 11.601      | C40H78NO8 [M+H] <sup>+</sup> | 700.5722                 | 34:1        |

phosphatidylinositol (PI)

|   | detected<br><i>m/z</i> | RT<br>(min) | formula                          | calculated<br><i>m/z</i> | lipid chain |
|---|------------------------|-------------|----------------------------------|--------------------------|-------------|
| 1 | 882.6040               | 11.246      | C45H89NO13P [M+NH4] <sup>+</sup> | 882.6066                 | 36:1        |

tuberculosinyladenosine (TbAd)

|         | detected<br><i>m/z</i> | RT<br>(min) | formula                       | calculated<br><i>m/z</i> |
|---------|------------------------|-------------|-------------------------------|--------------------------|
| 1-TbAd  | 540.3538               | 3.272       | C30H46N5O4 [M+H] <sup>+</sup> | 540.3544                 |
| N6-TbAd | 540.3532               | 5.688       | C30H46N5O4 [M+H] <sup>+</sup> | 540.3545                 |

# triacylglycerol (TAG)

|    | detected<br>m/z | RT<br>(min) | formula                         | calculated<br>m/z | lipid chain |
|----|-----------------|-------------|---------------------------------|-------------------|-------------|
| 1  | 968.7694        | 14.088      | C63H102NO6 [M+NH4] <sup>+</sup> | 968.7702          | C60:12      |
| 2  | 994.7844        | 14.088      | C65H104NO6 [M+NH4] <sup>+</sup> | 994.7858          | C62:13      |
| 3  | 944.7688        | 14.160      | C61H102NO6 [M+NH4] <sup>+</sup> | 944.7702          | C58:10      |
| 4  | 970.7836        | 14.170      | C63H104NO6 [M+NH4] <sup>+</sup> | 970.7859          | C60:11      |
| 5  | 1022.8180       | 14.185      | C67H108NO6 [M+NH4] <sup>+</sup> | 1022.8171         | C64:13      |
| 6  | 996.7998        | 14.196      | C65H106NO6 [M+NH4] <sup>+</sup> | 996.8015          | C62:12      |
| 7  | 920.7695        | 14.226      | C59H102NO6 [M+NH4] <sup>+</sup> | 920.7702          | C56:8       |
| 8  | 946.7824        | 14.246      | C61H104NO6 [M+NH4] <sup>+</sup> | 946.7858          | C58:9       |
| 9  | 972.7975        | 14.283      | C63H106NO6 [M+NH4] <sup>+</sup> | 972.8015          | C60:10      |
| 10 | 1024.8310       | 14.301      | C67H110NO6 [M+NH4] <sup>+</sup> | 1024.8328         | C64:12      |
| 11 | 998.8142        | 14.303      | C65H108NO6 [M+NH4] <sup>+</sup> | 998.8171          | C62:11      |
| 12 | 896.7684        | 14.333      | C57H102NO6 [M+NH4] <sup>+</sup> | 896.7702          | C54:6       |
| 13 | 922.7844        | 14.364      | C59H104NO6 [M+NH4] <sup>+</sup> | 922.7858          | C56:7       |
| 14 | 884.7695        | 14.374      | C56H102NO6 [M+NH4] <sup>+</sup> | 884.7702          | C53:5       |
| 15 | 948.7996        | 14.377      | C61H106NO6 [M+NH4] <sup>+</sup> | 948.8015          | C58:8       |
| 16 | 974.8139        | 14.388      | C63H108NO6 [M+NH4] <sup>+</sup> | 974.8187          | C60:9       |
| 17 | 910.7857        | 14.398      | C58H104NO6 [M+NH4] <sup>+</sup> | 910.7858          | C55:6       |
| 18 | 872.7681        | 14.402      | C55H102NO6 [M+NH4] <sup>+</sup> | 872.7702          | C52:4       |
| 19 | 936.8012        | 14.413      | C60H106NO6 [M+NH4] <sup>+</sup> | 936.8015          | C57:7       |
| 20 | 1000.8250       | 14.414      | C65H110NO6 [M+NH4] <sup>+</sup> | 1000.8328         | C62:10      |
| 21 | 898.7834        | 14.442      | C57H104NO6 [M+NH4] <sup>+</sup> | 898.7858          | C54:5       |
| 22 | 886.7828        | 14.468      | C56H104NO6 [M+NH4] <sup>+</sup> | 886.7858          | C53:4       |
| 23 | 924.8001        | 14.468      | C59H106NO6 [M+NH4] <sup>+</sup> | 924.8015          | C56:6       |
| 24 | 950.8141        | 14.485      | C61H108NO6 [M+NH4] <sup>+</sup> | 950.8171          | C58:7       |
| 25 | 976.8296        | 14.496      | C63H110NO6 [M+NH4] <sup>+</sup> | 976.8328          | C60:8       |
| 26 | 848.7685        | 14.505      | C53H102NO6 [M+NH4] <sup>+</sup> | 848.7702          | C50:2       |
| 27 | 874.7842        | 14.511      | C55H104NO6 [M+NH4] <sup>+</sup> | 874.7858          | C52:3       |
| 28 | 912.7990        | 14.514      | C58H106NO6 [M+NH4] <sup>+</sup> | 912.8015          | C55:5       |
| 29 | 938.8153        | 14.516      | C60H108NO6 [M+NH4] <sup>+</sup> | 938.8171          | C57:6       |
| 30 | 1002.8440       | 14.535      | C65H112NO6 [M+NH4] <sup>+</sup> | 1002.8484         | C62:9       |
| 31 | 900.7987        | 14.545      | C57H106NO6 [M+NH4] <sup>+</sup> | 900.8015          | C54:4       |
| 32 | 862.7841        | 14.582      | C54H104NO6 [M+NH4] <sup>+</sup> | 862.7858          | C51:2       |
| 33 | 926.8144        | 14.583      | C59H108NO6 [M+NH4] <sup>+</sup> | 926.8171          | C56:5       |
| 34 | 888.7990        | 14.588      | C56H106NO6 [M+NH4] <sup>+</sup> | 888.8015          | C53:3       |
| 35 | 952.8292        | 14.597      | C61H110NO6 [M+NH4] <sup>+</sup> | 952.8328          | C58:6       |
| 36 | 914.8136        | 14.622      | C58H108NO6 [M+NH4] <sup>+</sup> | 914.8171          | C55:4       |
| 37 | 978.8465        | 14.630      | C63H112NO6 [M+NH4] <sup>+</sup> | 978.8484          | C60:7       |
| 38 | 940.8305        | 14.637      | C60H110NO6 [M+NH4] <sup>+</sup> | 940.8328          | C57:5       |
| 39 | 1005.8610       | 14.656      | C65H114NO6 [M+NH4] <sup>+</sup> | 1004.8641         | C62:8       |
| 40 | 902.8153        | 14.673      | C57H108NO6 [M+NH4] <sup>+</sup> | 902.8171          | C54:3       |
| 41 | 876.8007        | 14.681      | C55H106NO6 [M+NH4] <sup>+</sup> | 876.8015          | C52:2       |
| 42 | 928.8288        | 14.705      | C59H110NO6 [M+NH4] <sup>+</sup> | 928.8328          | C56:4       |
| 43 | 954.8439        | 14.730      | C61H112NO6 [M+NH4] <sup>+</sup> | 954.8484          | C58:5       |
| 44 | 942.8453        | 14.731      | C60H112NO6 [M+NH4] <sup>+</sup> | 942.8484          | C57:4       |
| 45 | 980.8594        | 14.734      | C63H114NO6 [M+NH4] <sup>+</sup> | 980.8641          | C60:6       |
| 46 | 916.8294        | 14.741      | C58H110NO6 [M+NH4] <sup>+</sup> | 916.8328          | C55:3       |
| 47 | 864.7987        | 14.743      | C54H106NO6 [M+NH4] <sup>+</sup> | 864.8015          | C51:1       |
| 48 | 890.8150        | 14.744      | C56H108NO6 [M+NH4] <sup>+</sup> | 890.8171          | C53:2       |
| 49 | 930.8462        | 14.828      | C59H112NO6 [M+NH4] <sup>+</sup> | 930.8484          | C56:3       |
| 50 | 904.8308        | 14.838      | C57H110NO6 [M+NH4] <sup>+</sup> | 904.8328          | C54:2       |
| 51 | 956.8584        | 14.848      | C61H114NO6 [M+NH4] <sup>+</sup> | 956.8641          | C58:4       |
| 52 | 892.8296        | 14.857      | C56H110NO6 [M+NH4] <sup>+</sup> | 892.8328          | C53:1       |
| 53 | 878.8156        | 14.865      | C55H108NO6 [M+NH4] <sup>+</sup> | 878.8171          | C52:1       |
| 54 | 982.8753        | 14.899      | C63H116NO6 [M+NH4] <sup>+</sup> | 982.8797          | C60:5       |
| 55 | 1008.8910       | 14.906      | C65H118NO6 [M+NH4] <sup>+</sup> | 1008.8954         | C62:6       |
| 56 | 984.8913        | 14.997      | C63H118NO6 [M+NH4] <sup>+</sup> | 984.8954          | C60:4       |
| 57 | 932.8613        | 15.006      | C59H114NO6 [M+NH4] <sup>+</sup> | 932.8641          | C56:2       |
| 58 | 986.9079        | 15.148      | C63H120NO6 [M+NH4] <sup>+</sup> | 986.9110          | C60:3       |
| 59 | 1038.9400       | 15.192      | C67H124NO6 [M+NH4] <sup>+</sup> | 1038.9423         | C64:5       |
| 60 | 988.9242        | 15.318      | C63H122NO6 [M+NH4] <sup>+</sup> | 988.9267          | C60:2       |
| 61 | 962.9088        | 15.331      | C61H120NO6 [M+NH4] <sup>+</sup> | 962.9110          | C58:1       |



## monoalkyldiacylglycerol (MADAG)

|    | detected<br>m/z | RT<br>(min) | formula                         | calculated<br>m/z | lipid chain |
|----|-----------------|-------------|---------------------------------|-------------------|-------------|
| 1  | 908.8064        | 14.658      | C59H106NO5 [M+NH4] <sup>+</sup> | 908.8066          | C56:7       |
| 2  | 882.7861        | 14.661      | C57H104NO5 [M+NH4] <sup>+</sup> | 882.7909          | C54:6       |
| 3  | 858.7869        | 14.741      | C55H104NO5 [M+NH4] <sup>+</sup> | 858.7909          | C52:4       |
| 4  | 884.8020        | 14.761      | C57H106NO5 [M+NH4] <sup>+</sup> | 884.8066          | C54:5       |
| 5  | 910.8193        | 14.767      | C59H108NO5 [M+NH4] <sup>+</sup> | 910.8222          | C56:6       |
| 6  | 936.8406        | 14.777      | C61H110NO5 [M+NH4] <sup>+</sup> | 936.8379          | C58:7       |
| 7  | 834.7879        | 14.814      | C53H104NO5 [M+NH4] <sup>+</sup> | 834.7909          | C50:2       |
| 8  | 860.8030        | 14.826      | C55H106NO5 [M+NH4] <sup>+</sup> | 860.8066          | C52:3       |
| 9  | 886.8175        | 14.859      | C57H108NO5 [M+NH4] <sup>+</sup> | 886.8222          | C54:4       |
| 10 | 912.8334        | 14.889      | C59H110NO5 [M+NH4] <sup>+</sup> | 912.8379          | C56:5       |
| 11 | 938.8520        | 14.923      | C61H112NO5 [M+NH4] <sup>+</sup> | 938.8535          | C58:6       |
| 12 | 862.8200        | 14.959      | C55H108NO5 [M+NH4] <sup>+</sup> | 862.8222          | C52:2       |
| 13 | 836.8042        | 14.973      | C53H106NO5 [M+NH4] <sup>+</sup> | 836.8066          | C50:1       |
| 14 | 888.8344        | 14.977      | C57H110NO5 [M+NH4] <sup>+</sup> | 888.8379          | C54:3       |
| 15 | 914.8461        | 14.984      | C59H112NO5 [M+NH4] <sup>+</sup> | 914.8535          | C56:4       |
| 16 | 940.8646        | 15.034      | C61H114NO5 [M+NH4] <sup>+</sup> | 940.8692          | C58:5       |
| 17 | 966.8828        | 15.064      | C63H116NO5 [M+NH4] <sup>+</sup> | 966.8848          | C60:6       |
| 18 | 916.8640        | 15.119      | C59H114NO5 [M+NH4] <sup>+</sup> | 916.8692          | C56:3       |
| 19 | 890.8497        | 15.122      | C57H112NO5 [M+NH4] <sup>+</sup> | 890.8535          | C54:2       |
| 20 | 942.8793        | 15.150      | C61H116NO5 [M+NH4] <sup>+</sup> | 942.8848          | C58:4       |
| 21 | 968.8947        | 15.193      | C63H118NO5 [M+NH4] <sup>+</sup> | 968.9005          | C60:5       |
| 22 | 970.9098        | 15.309      | C63H120NO5 [M+NH4] <sup>+</sup> | 970.9161          | C60:4       |

**Supplemental Figure 6. Summary of 1-TbAd induced lipid change in human macrophages.** Lipids are described according to their chemical names, or—for detected molecules of unknown composition—by their m/z values. Raw intensity values are given for every lipid, and selected lipids of high biological value were compared to external standard curves to generate absolute lipid concentration. Lipids are considered changed by 1-TbAd treatment when their intensity value changes by more than 2-fold with a multiple-test-corrected p-value < 0.05.

## external standard

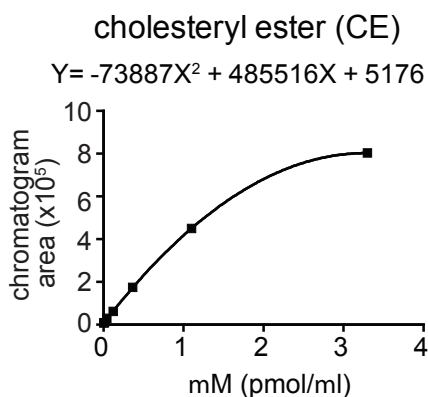

## macrophage lipids

intensity (counts)

| m/z (lipid chain) | untreated          | N6-TbAd            | 1-TbAd 5 $\mu$ M   | 1-TbAd 10 $\mu$ M   | 1-TbAd 20 $\mu$ M  |
|-------------------|--------------------|--------------------|--------------------|---------------------|--------------------|
| 642.6189 (16:0)   | 60422 $\pm$ 8136   | 57248 $\pm$ 5097   | 109938 $\pm$ 21760 | 114756 $\pm$ 39665  | 118544 $\pm$ 7720  |
| 666.6176 (18:2)   | 68054 $\pm$ 10147  | 6220 $\pm$ 6618    | 121474 $\pm$ 33040 | 137781 $\pm$ 48426  | 141095 $\pm$ 6882  |
| 668.6330 (18:1)   | 155807 $\pm$ 18909 | 142712 $\pm$ 34887 | 347662 $\pm$ 85469 | 444755 $\pm$ 126677 | 417446 $\pm$ 66729 |
| 690.6184 (20:4)   | 74903 $\pm$ 8612   | 63134 $\pm$ 13551  | 163638 $\pm$ 33473 | 255550 $\pm$ 139198 | 247460 $\pm$ 58703 |

pmol / million cells

| m/z (lipid chain) | untreated         | N6-TbAd           | 1-TbAd 5 $\mu$ M   | 1-TbAd 10 $\mu$ M  | 1-TbAd 20 $\mu$ M  |
|-------------------|-------------------|-------------------|--------------------|--------------------|--------------------|
| 642.6189 (16:0)   | 289.7 $\pm$ 43.5  | 272.7 $\pm$ 27.2  | 559.1 $\pm$ 120.3  | 587.2 $\pm$ 221.3  | 606.2 $\pm$ 42.9   |
| 666.6176 (18:2)   | 330.5 $\pm$ 54.6  | 299.1 $\pm$ 35.4  | 623.9 $\pm$ 184.3  | 717.2 $\pm$ 275.5  | 732.6 $\pm$ 39.0   |
| 668.6330 (18:1)   | 816.7 $\pm$ 107.7 | 743.4 $\pm$ 198.8 | 2026.7 $\pm$ 569.2 | 2765.3 $\pm$ 946.4 | 2518.5 $\pm$ 485.7 |
| 690.6184 (20:4)   | 367.3 $\pm$ 46.4  | 304.3 $\pm$ 72.6  | 862.7 $\pm$ 191.4  | 1450.5 $\pm$ 904.1 | 1366.5 $\pm$ 359.0 |

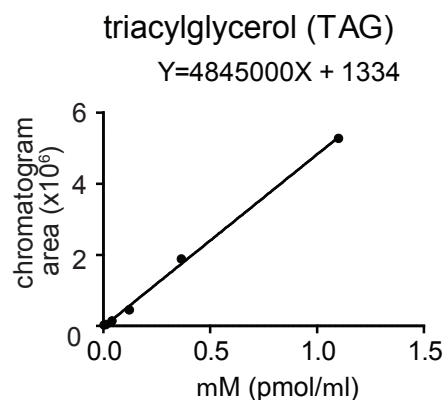

intensity (counts)

| m/z (lipid chain) | untreated          | N6-TbAd            | 1-TbAd 5 $\mu$ M    | 1-TbAd 10 $\mu$ M   | 1-TbAd 20 $\mu$ M   |
|-------------------|--------------------|--------------------|---------------------|---------------------|---------------------|
| 848.7702 (50:2)   | 168176 $\pm$ 1454  | 246398 $\pm$ 34547 | 229499 $\pm$ 161063 | 355008 $\pm$ 129199 | 394242 $\pm$ 54882  |
| 876.8015 (52:2)   | 450822 $\pm$ 29725 | 559546 $\pm$ 94582 | 970576 $\pm$ 137714 | 991938 $\pm$ 415657 | 999044 $\pm$ 74712  |
| 898.7858 (54:5)   | 96757 $\pm$ 10938  | 107807 $\pm$ 31586 | 431051 $\pm$ 265473 | 380241 $\pm$ 98427  | 541210 $\pm$ 102987 |
| 928.8328 (56:4)   | 109463 $\pm$ 21518 | 126164 $\pm$ 22942 | 349792 $\pm$ 184535 | 250693 $\pm$ 77012  | 401152 $\pm$ 31257  |

pmol / million cells

| m/z (lipid chain) | untreated        | N6-TbAd          | 1-TbAd 5 $\mu$ M  | 1-TbAd 10 $\mu$ M | 1-TbAd 20 $\mu$ M |
|-------------------|------------------|------------------|-------------------|-------------------|-------------------|
| 848.7702 (50:2)   | 100.3 $\pm$ 0.8  | 140.6 $\pm$ 17.8 | 131.9 $\pm$ 83.1  | 196.7 $\pm$ 66.7  | 216.9 $\pm$ 28.3  |
| 876.8015 (52:2)   | 246.1 $\pm$ 15.3 | 302.2 $\pm$ 48.8 | 514.3 $\pm$ 71.1  | 525.3 $\pm$ 214.5 | 529.0 $\pm$ 38.6  |
| 898.7858 (54:5)   | 63.4 $\pm$ 5.6   | 69.1 $\pm$ 16.3  | 235.9 $\pm$ 137.0 | 209.7 $\pm$ 50.8  | 292.7 $\pm$ 53.1  |
| 928.8328 (56:4)   | 70.0 $\pm$ 11.1  | 78.6 $\pm$ 11.8  | 194.0 $\pm$ 95.2  | 142.8 $\pm$ 39.7  | 220.5 $\pm$ 16.1  |

The estimated lipid pool size by HPLC-MS analysis was obtained by comparing MS counts of macrophage lipids to the indicated external standards, as detailed in the Methods.

**Supplemental Figure 7. Quantitation of 1-TbAd induced neutral lipids.** To estimate the neutral lipid pool sizes based on lipid concentration, authentic lipids were obtained and used to generate standard curves.

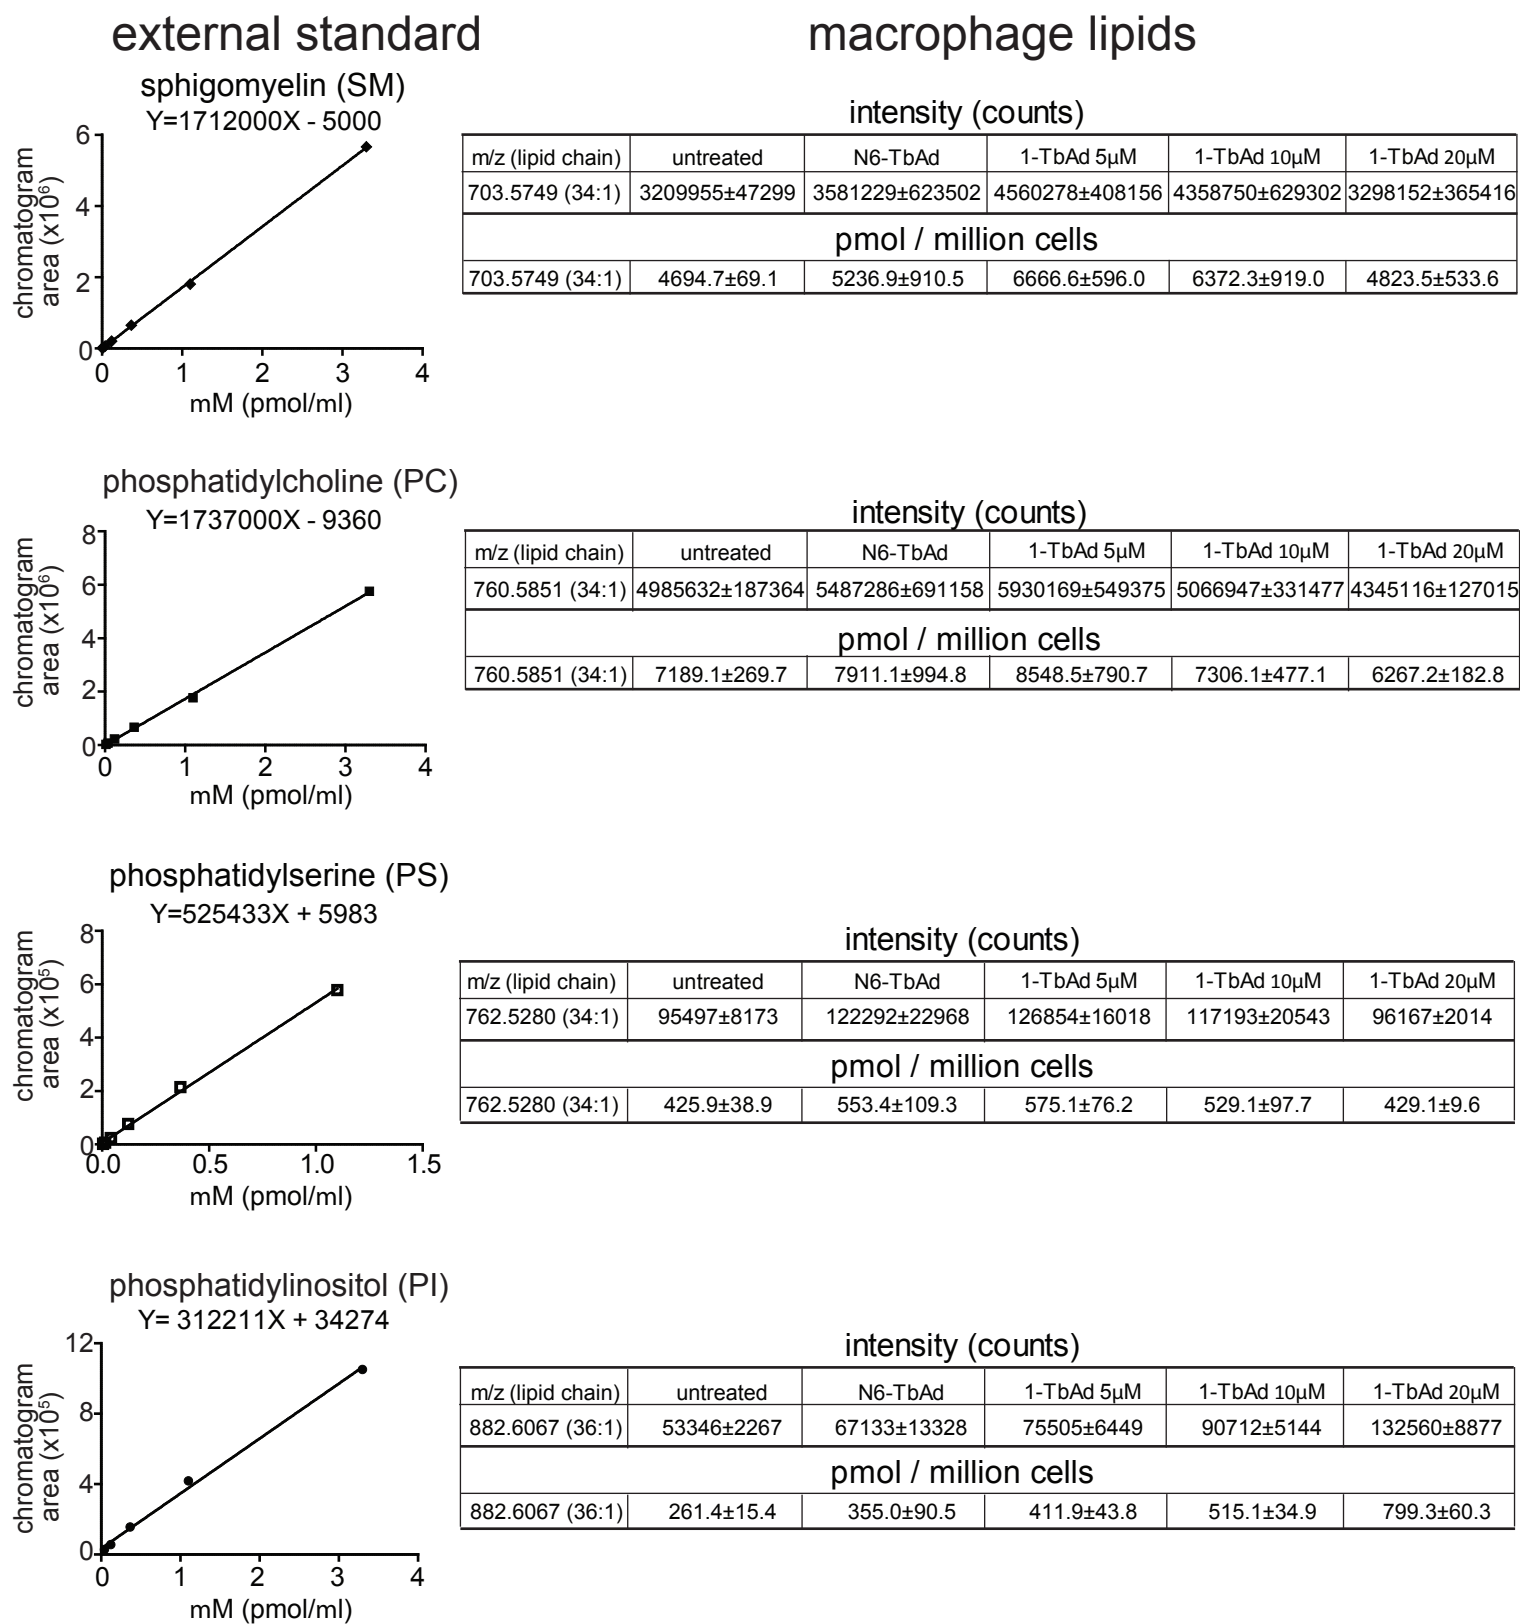

**Supplemental Figure 8. 1-TbAd induced lipid changes in membrane lipids.** To estimate the membrane phospholipid pool sizes based on lipid concentration, authentic standards for selected lipids were obtained and used to generate standard curves.

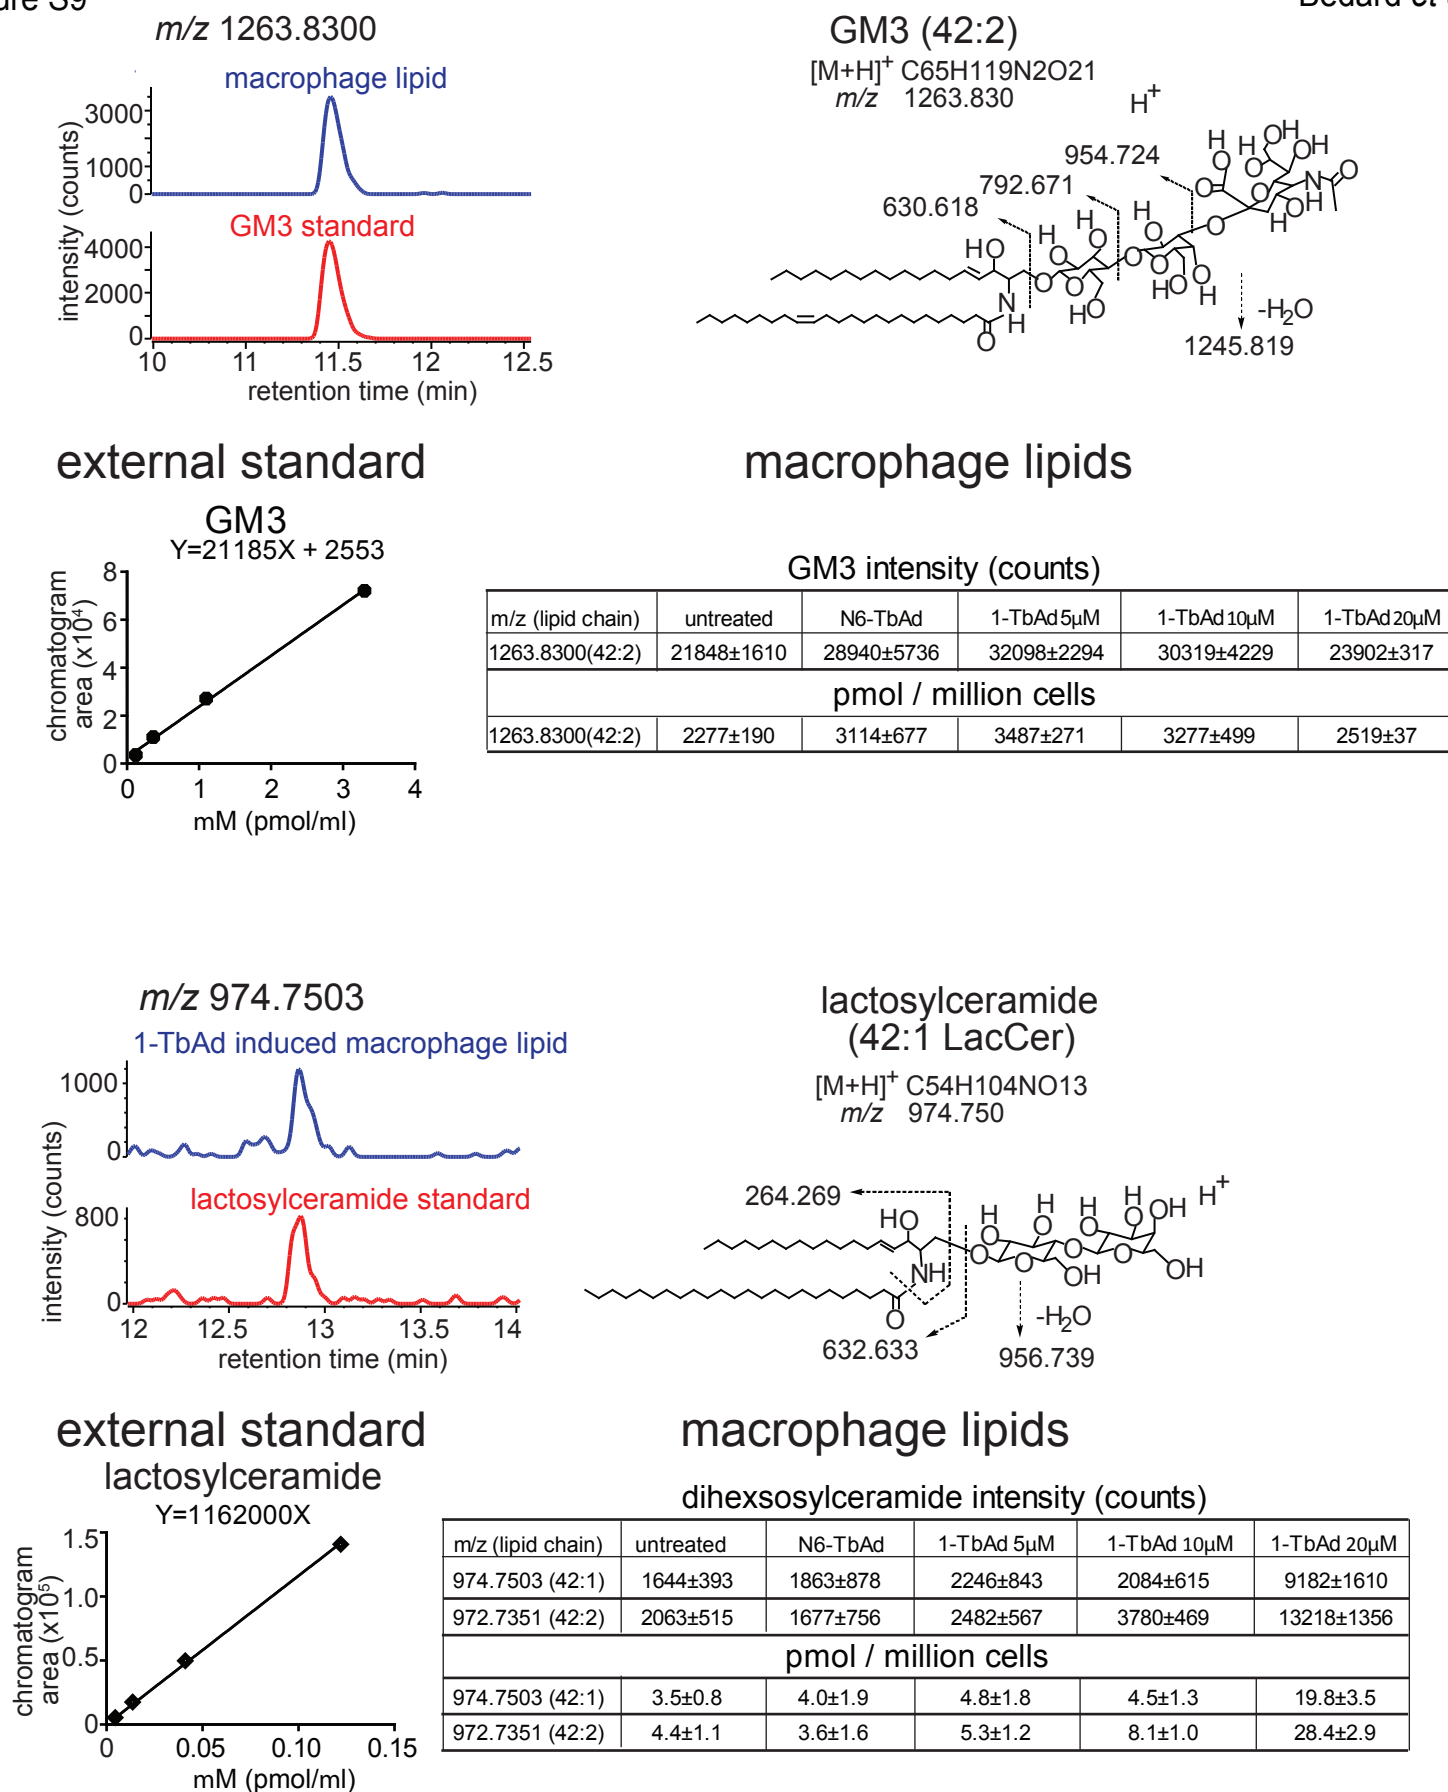

**Supplemental Figure 9. 1-TbAd influence on Ganglioside M3 (GM3) and lactosyl ceramide.** HPLC analysis of human macrophage derived lipids with authentic standards shows coelution. CID-MS of both macrophage-derived lipids in the positive mode shows dehydration products or loss of the indicated carbohydrate or lipid moiety. External standard curves were generated and used to estimate the absolute concentration of lipid induced.

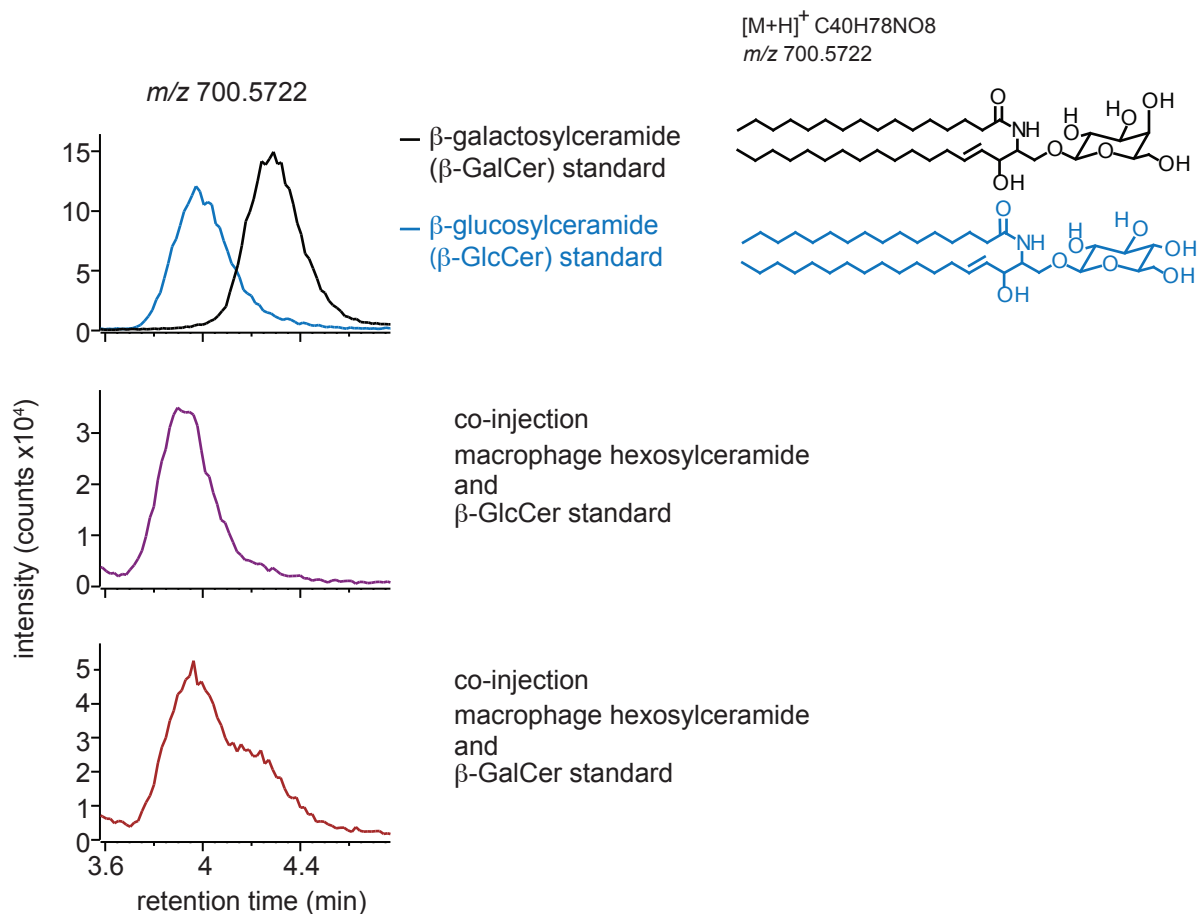

### external standard

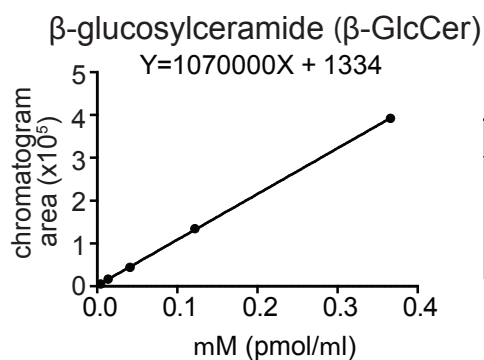

| hexosylceramide intensity (counts) |                 |                 |                  |                   |                   |
|------------------------------------|-----------------|-----------------|------------------|-------------------|-------------------|
| m/z (lipid chain)                  | untreated       | N6-TbAd         | 1-TbAd 5 $\mu$ M | 1-TbAd 10 $\mu$ M | 1-TbAd 20 $\mu$ M |
| 700.5722 (34:1)                    | 7695 $\pm$ 1413 | 9929 $\pm$ 3181 | 13180 $\pm$ 2539 | 15230 $\pm$ 3397  | 27110 $\pm$ 3644  |
| pmol / million cells               |                 |                 |                  |                   |                   |
| 700.5722 (34:1)                    | 14.9 $\pm$ 3.3  | 20.1 $\pm$ 7.4  | 27.7 $\pm$ 5.9   | 32.5 $\pm$ 7.9    | 60.2 $\pm$ 8.5    |

**Supplemental Figure 10. HPLC analysis of an unknown macrophage-derived lipid.** Comparison to an internal  $\beta$ -glucosyl ceramide shows precise comigration of the standard and unknown. External standard curves were generated and used to estimate the absolute lipid concentration.

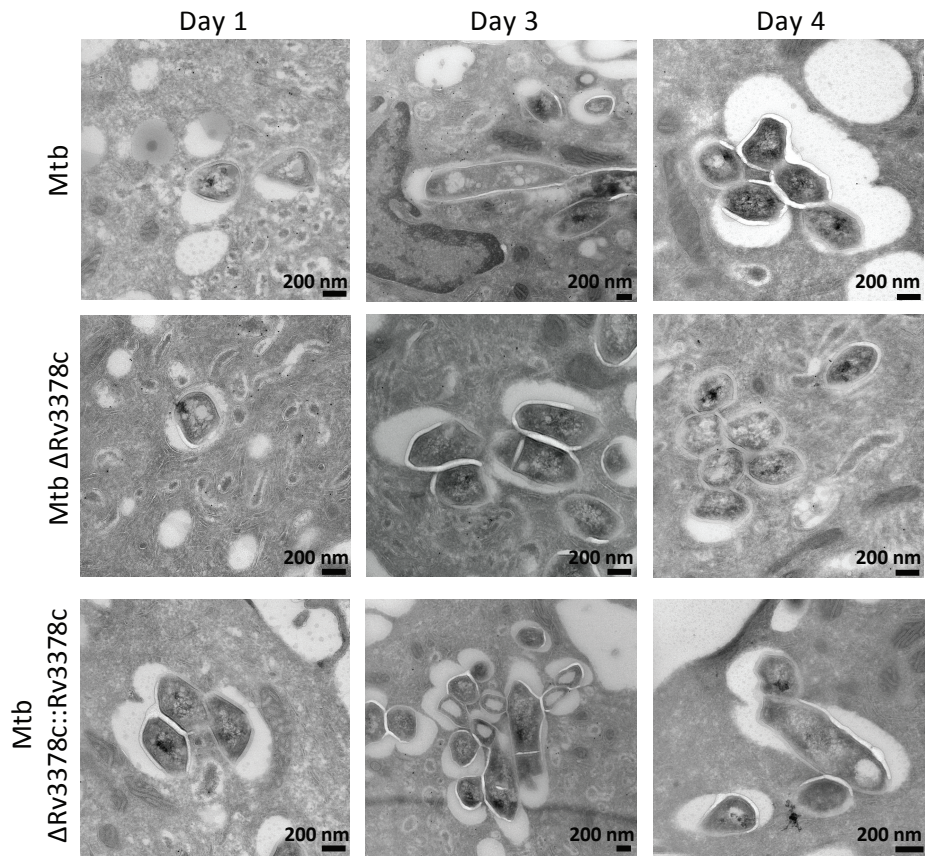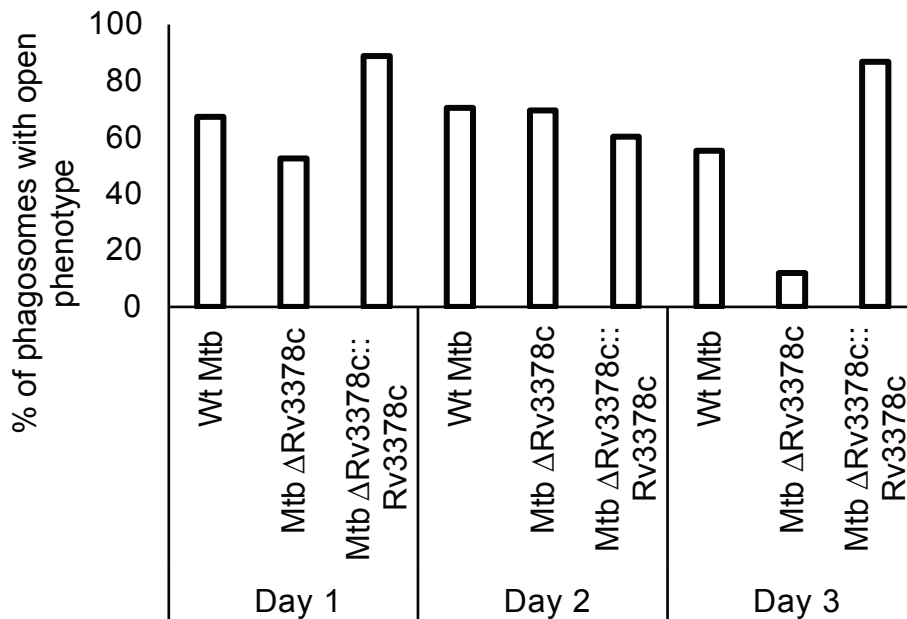

**Supplemental Figure 11. Analysis of lysosomal swelling in response to Mtb infection over time.** Human macrophages were infected with the indicated strain of Mtb H37Rv (MOI=2) for the indicated time and subjected to TEM to detect swollen phagosomes (open) using a previously validated method (Buter *et al.*, 2019). Quantification was performed on cells from Day 1 (302 phagosomes), Day 3 (422 phagosomes), and Day 4 (232 phagosomes).

**Supplemental Table 1 - Source of Cell lines, antibodies and chemicals used.**

| REAGENT or RESOURCE                              | SOURCE                           | IDENTIFIER               |
|--------------------------------------------------|----------------------------------|--------------------------|
| <b>Antibodies</b>                                |                                  |                          |
| CD206 – BV421                                    | Biologend                        | 321125                   |
| CD16 – BV510                                     | Biologend                        | 302048                   |
| HLA-DR – BV605                                   | Biologend                        | 307639                   |
| CD36 – PE                                        | Biologend                        | 336205                   |
| CD80 – PE-Cy7                                    | BD Pharmingen                    | 561135                   |
| CD14 – AF700                                     | BD Pharmingen                    | 557923                   |
| CD163 – PE-Texas Ted                             | Biologend                        | 333623                   |
| LC3a/b                                           | Cell Signaling                   | 4108S                    |
| LAMP1                                            | Biologend                        | 328602                   |
| mTOR (7C10)                                      | Cell Signaling                   | 2983S                    |
| Goat anti-rabbit AF568                           | invitrogen                       | A11036                   |
| Goat anti- rabbit AF488                          | Life Technology                  | A10520                   |
| Goat anti- mouse AF568                           | invitrogen                       | A11031                   |
| Goat anti-mouse AF488                            | invitrogen                       | A11029                   |
| LC3B (immunofluorescence)                        | MBL                              | PM036                    |
| LAMP1 (murine) (immunofluorescence)              | Developmental Studies            | 1D4B                     |
| LAMP1 (human) (immunofluorescence)               | Developmental Studies            | H4A3                     |
| LAMP1 (H5G11) (human) (immunofluorescence)       | Santa Cruz Biotechnology         | <a href="#">sc-18821</a> |
| anti-Rabbit AlexaFluor 488 (immunofluorescence)  | ThermoFisher                     | A21441                   |
| anti-rat AlexaFluor 568 (immunofluorescence)     | ThermoFisher                     | A11077                   |
| anti-mouse AlexaFluor 568 (immunofluorescence)   | ThermoFisher                     | A11004                   |
| anti-mouse AlexaFluor 594 (immunofluorescence)   | ThermoFisher                     | A11005                   |
| LC3B (Western blot)                              | Abcam                            | ab48394                  |
| p62                                              | CST                              | 5114                     |
| Phospho-ULK1 (Ser757) (D7O6U)                    | CST                              | 14202                    |
| ULK1 (D8H5)                                      | CST                              | 8054                     |
| Phospho-4E-BP1 (Ser65) (                         | CST                              | 9452                     |
| 4E-BP1                                           | CST                              | 9451                     |
| Phospho-p70 S6 Kinase (Thr389)                   | CST                              | 9205                     |
| p70 S6 Kinase (49D7)                             | CST                              | 2708                     |
| actin HRP                                        | CST                              | 12262                    |
| Mouse anti human LAMP1 (immunogold and CLEM)     | Pharmingen                       | H4A3                     |
| Mouse anti human Perilipin2 (immunogold)         | Progen                           | 610102                   |
| Rabbit anti human LC3 (immunogold)               | Abcam                            |                          |
| Anti Mtb cell wall protein (immunofluorescence)  | John Spencer and Patrick Brennan | C188                     |
| Rabbit anti mouse bridging antibody (immonogold) | DAKO                             | Z259                     |
| Protein A 10 nm gold (immunogold)                | Utrecht University               |                          |
| Protein A 15nm gold (immunogold)                 | Utrecht University               |                          |
| Goat anti mouse alexa 488 (CLEM)                 | Life technologies                | A11001                   |

|                                                       |                                           |                 |
|-------------------------------------------------------|-------------------------------------------|-----------------|
| Goat anti rabbit alexa 488                            | Molecular probes                          | A32731          |
| <b>Human Cell Sources</b>                             |                                           |                 |
| Leukoreduction Collars                                | BWH Blood Bank                            |                 |
| Leukocyte Cones                                       | NHS Blood and Transport                   |                 |
| Bronchoalveolar lavage fluid                          | St James Hospital, Dublin                 |                 |
| <b>Chemicals, peptides, and recombinant proteins</b>  |                                           |                 |
| Chloroquine diphosphate salt                          | Sigma Aldrich                             | C6628-100G      |
| Oleate-BSA                                            | Millipore Sigma                           | O3008-5ML       |
| LPS                                                   | This lab                                  |                 |
| hGMCSF                                                | Peprotech                                 | 300-03-50UG     |
| hMCSF                                                 | Peprotech                                 | 300-25-50UG     |
| Glutaraldehyde                                        | ThermoFisher/Electron Microscopy Sciences | 50-262-18       |
| Formaldehyde                                          | ThermoFisher/Electron Microscopy Sciences | 50-980-487      |
| Saponin                                               | Sigma Aldrich                             |                 |
| Paraformaldehyde                                      | Sigma Aldrich                             | 158127          |
| Hoescht 33342 (bisBenzimide H 33342 trihydrochloride) | Sigma Aldrich                             | B2261           |
| Fish Gelatin                                          | Sigma Aldrich                             | G7765           |
| <b>Critical commercial assays or reagents</b>         |                                           |                 |
| DQ-BSA RED                                            | Thermo Fisher/Invitrogen                  | D12051          |
| C <sub>12</sub> FDG                                   | ThermoFisher Scientific - invitrogen      | D2893           |
| Bodipy 493/503                                        | Thermo Fisher                             | D3922           |
| LIVE/DEAD™ Fixable Blue Dead Cell Stain Kit           | Thermo Fisher Scientific -invitrogen      | L34962          |
| MACS Milentyi LS columns                              | Miltenyi Biotec                           | 130-042-401     |
| CD14 <sup>+</sup> beads                               | Miltenyi Biotec                           | 130-050-201     |
| Hoechst 33342                                         | Life technologies                         | H21491          |
| Rapamycin                                             | Cell Signaling                            | 9904S           |
| LLOMe                                                 | Bachem                                    | 7000425         |
| Monensin                                              | Sigma                                     | M5273           |
| Bafilomycin A1                                        | Sigma                                     | B1793           |
| HCS LipidTox Green                                    | ThermoFisher Scientific - invitrogen      | H34475          |
| DAKO Fluorescent Mounting Medium                      | Agilent                                   | S3023           |
| <b>Cell lines</b>                                     |                                           |                 |
| THP1                                                  | This lab/ATCC                             |                 |
| RAW264.7                                              | Gutierrez lab/ATCC                        |                 |
| C8                                                    | Casma Therapeutics                        |                 |
| <b>Recombinant DNA</b>                                |                                           |                 |
| pJR966 CRISPRi plasmid – related to piJR965           |                                           | Addgene #115163 |



|                                                                       |                                                     |             |
|-----------------------------------------------------------------------|-----------------------------------------------------|-------------|
| GFP-mCherry-LC3B                                                      | Gift from Sharon Tooze, Francis Crick Institute, UK |             |
| <b>Software and algorithms</b>                                        |                                                     |             |
| Fiji                                                                  |                                                     |             |
| GraphPad®Prism                                                        |                                                     |             |
| CellProfiler                                                          |                                                     |             |
| <b>Other</b>                                                          |                                                     |             |
| BD Difco™ Dehydrated Culture Media: Middlebrook 7H10 Agar             | FisherScientific                                    | BD 262710   |
| Corning® 96 Well Solid Polystyrene Microplate                         | Millipore Sigma                                     | CLS3917     |
| RPMI 1640 Medium, no phenol red (Gibco)                               | Thermo FisherScientific                             | 11835030    |
| Zeocin™ Selection Reagent (Gibco)                                     | Thermo FisherScientific                             | R25001      |
| BD BBL™ Middlebrook OADC Enrichment                                   | FisherScientific                                    | B12351      |
| BD Difco™ Dehydrated Culture Media: Middlebrook 7H9 Broth             | FisherScientific                                    | DF0713-17-9 |
| BD Difco™ Glycerol                                                    | FisherScientific                                    | DF0282-17-0 |
| BD Difco™ Dehydrated Culture Media Additive: Tween™ 80 Polysorbate 80 | FisherScientific                                    | DF3118-15-6 |
| RPMI 1640 Medium (Gibco)                                              | ThermoFisher Scientific                             | 52400025    |
| Fetal Bovine Serum (Gibco)                                            | ThermoFisher Scientific                             | 10270106    |
| Cefotaxime                                                            | Melford Biolaboratories Ltd.                        |             |
| Amphotericin B (Gibco)                                                | ThermoFisher Scientific                             | 15290018    |
|                                                                       |                                                     |             |
